# Supplementary material for: Semilunar valves in pediatric orthotopic heart transplants grow at a slower rate than controls
Source: Research Square preprint supplement (doi:10.21203/rs.3.rs-6305563/v1), 2025-05-05
Supplement: Supplementary file 1 [file a385f50c61006ba1cb0fcacd.docx]

**3 Sensitivity Analysis (Leave-one-out Analysis)**

For sensitivity analysis, we conducted a leave-one-out (LOO) analysis by sequentially refitting the linear mixed-effects model while excluding one subject at a time. To evaluate the stability of our estimates, we visualized the distribution of model estimates using box plots and summarized the distribution of p-values across iterations. This approach allowed us to assess the influence of individual subjects on the model results and determine whether the findings were driven by any specific data points. The consistency of the estimates across LOO iterations supports the robustness of our model conclusions.

**3.1 Aortic Valve Annulus**

**3.1.1 Primary Analysis**


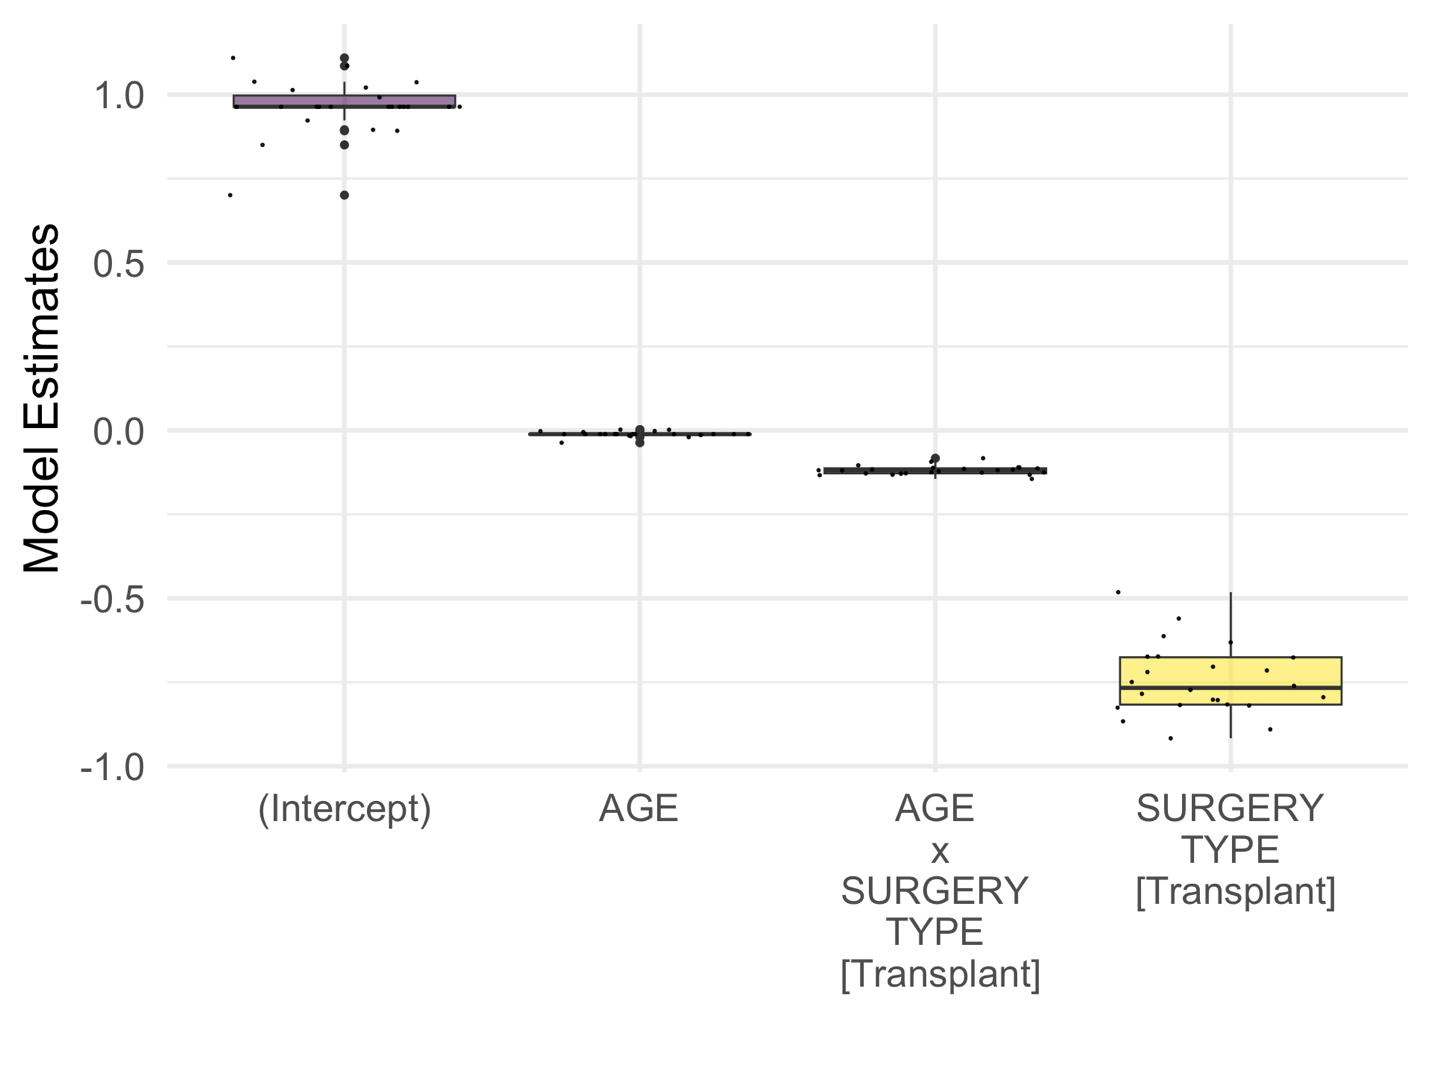


|  | **Min.** | **1st Qu.** | **Median** | **Mean** | **3rd Qu.** | **Max.** |
| --- | --- | --- | --- | --- | --- | --- |
| (Intercept) | **0.007** | **0.016** | **0.018** | **0.020** | **0.019** | **0.054** |
| AGE | 0.161 | 0.658 | 0.672 | 0.680 | 0.673 | 0.946 |
| SURGERY_TYPE [Transplant] | 0.097 | 0.152 | 0.179 | 0.190 | 0.225 | 0.326 |
| AGE x SURGERY_TYPE [Transplant] | 0.003 | 0.007 | 0.012 | 0.016 | 0.018 | 0.074 |

**3.1.2 Secondary Analysis (Subgroup Analysis for VSD Control)**


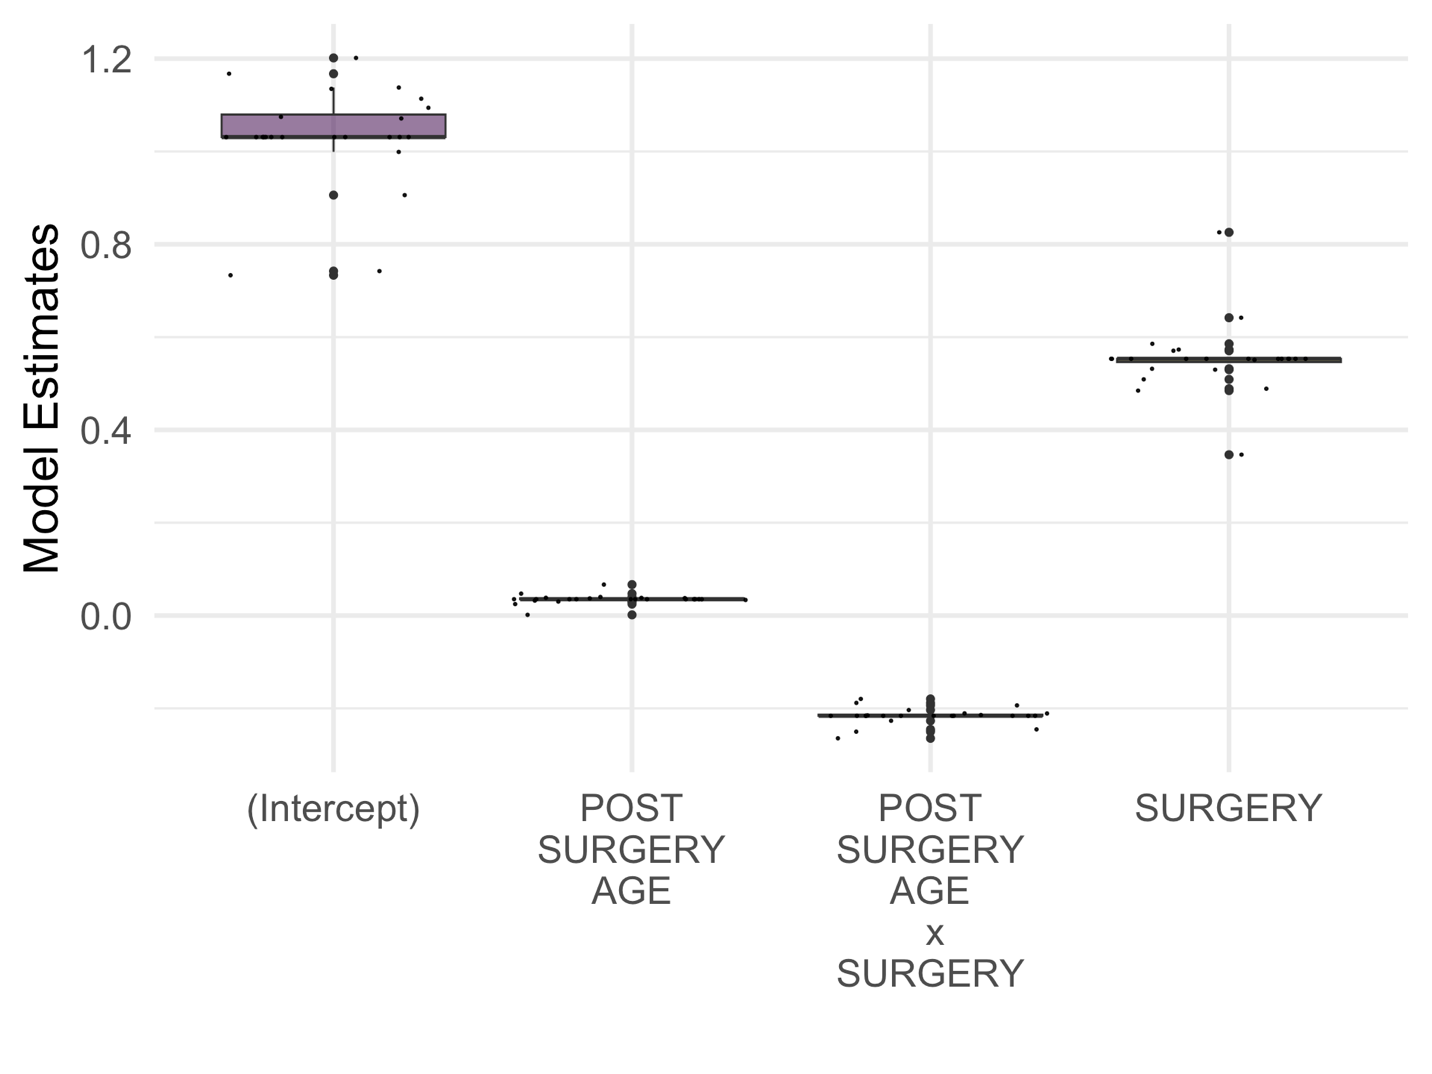


|  | **Min.** | **1st Qu.** | **Median** | **Mean** | **3rd Qu.** | **Max.** |
| --- | --- | --- | --- | --- | --- | --- |
| (Intercept) | 0.020 | 0.037 | 0.037 | 0.045 | 0.045 | 0.109 |
| POST_SURGERY_AGE | 0.115 | 0.331 | 0.341 | 0.365 | 0.341 | 0.966 |
| SURGERY | 0.011 | 0.070 | 0.070 | 0.084 | 0.082 | 0.280 |
| POST_SURGERY_AGE x SURGERY | 0.000 | 0.003 | 0.003 | 0.004 | 0.004 | 0.011 |

**3.2 Pulmonary Valve Annulus**

**3.2.1 Primary Analysis**

CODE


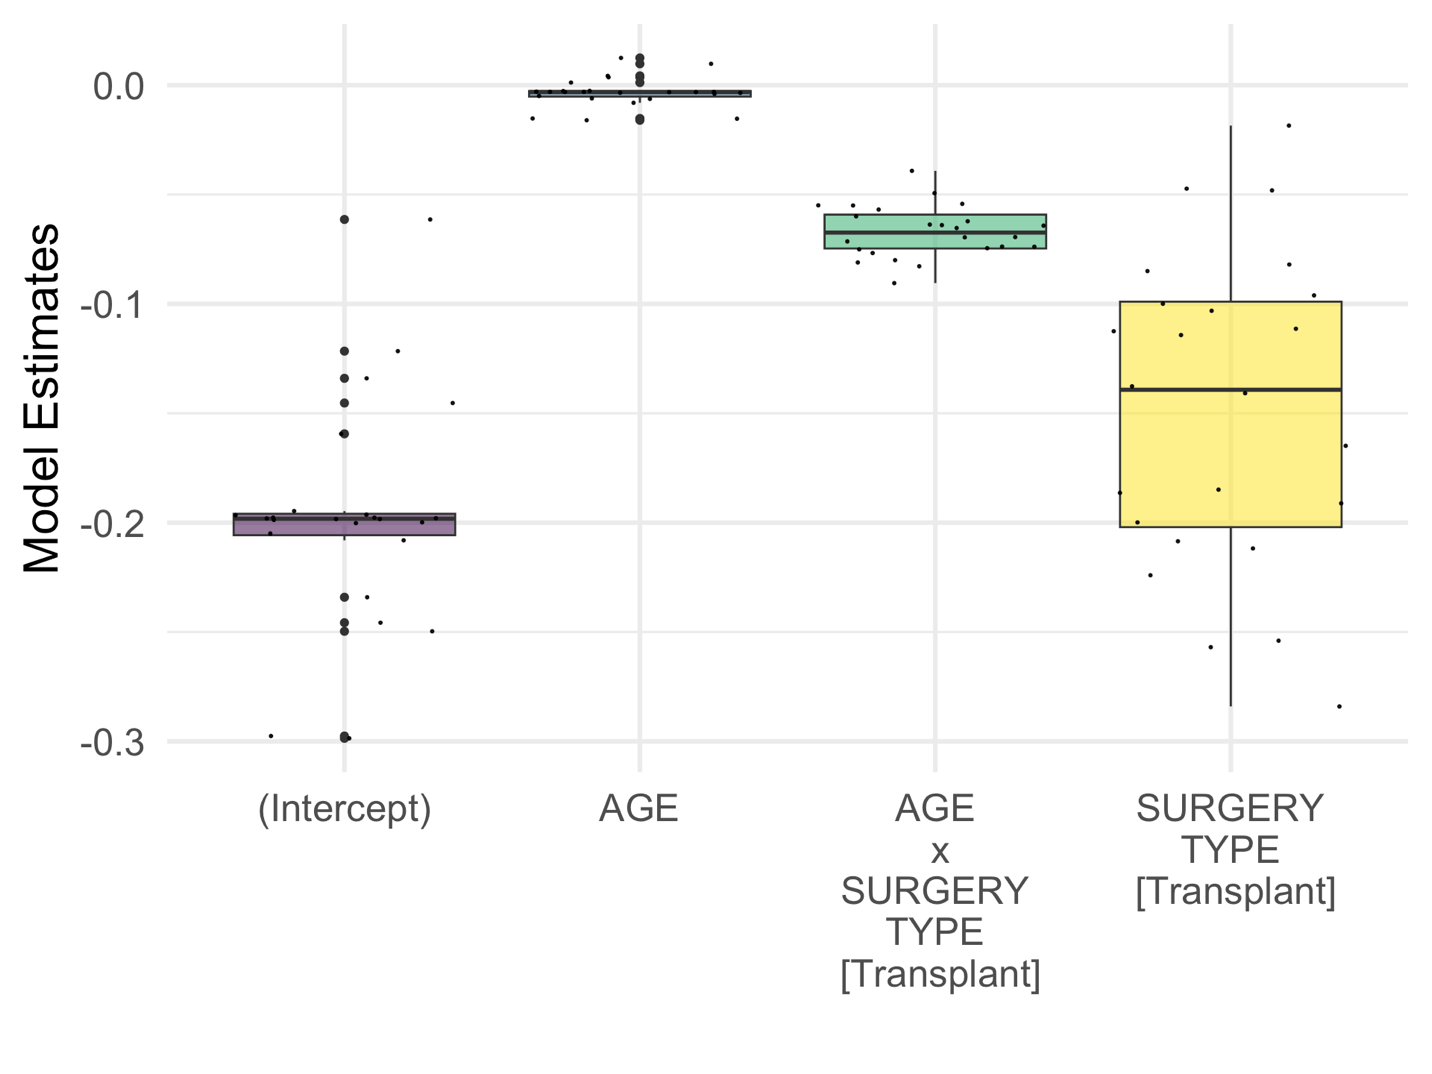


|  | **Min.** | **1st Qu.** | **Median** | **Mean** | **3rd Qu.** | **Max.** |
| --- | --- | --- | --- | --- | --- | --- |
| (Intercept) | 0.150 | 0.312 | 0.322 | 0.343 | 0.328 | 0.757 |
| AGE | 0.546 | 0.806 | 0.892 | 0.827 | 0.904 | 0.963 |
| SURGERY_TYPE [Transplant] | 0.315 | 0.477 | 0.640 | 0.621 | 0.734 | 0.949 |
| AGE x SURGERY_TYPE [Transplant] | 0.049 | 0.107 | 0.149 | 0.161 | 0.209 | 0.385 |

**3.2.2 Secondary Analysis (Subgroup Analysis for VSD Control)**


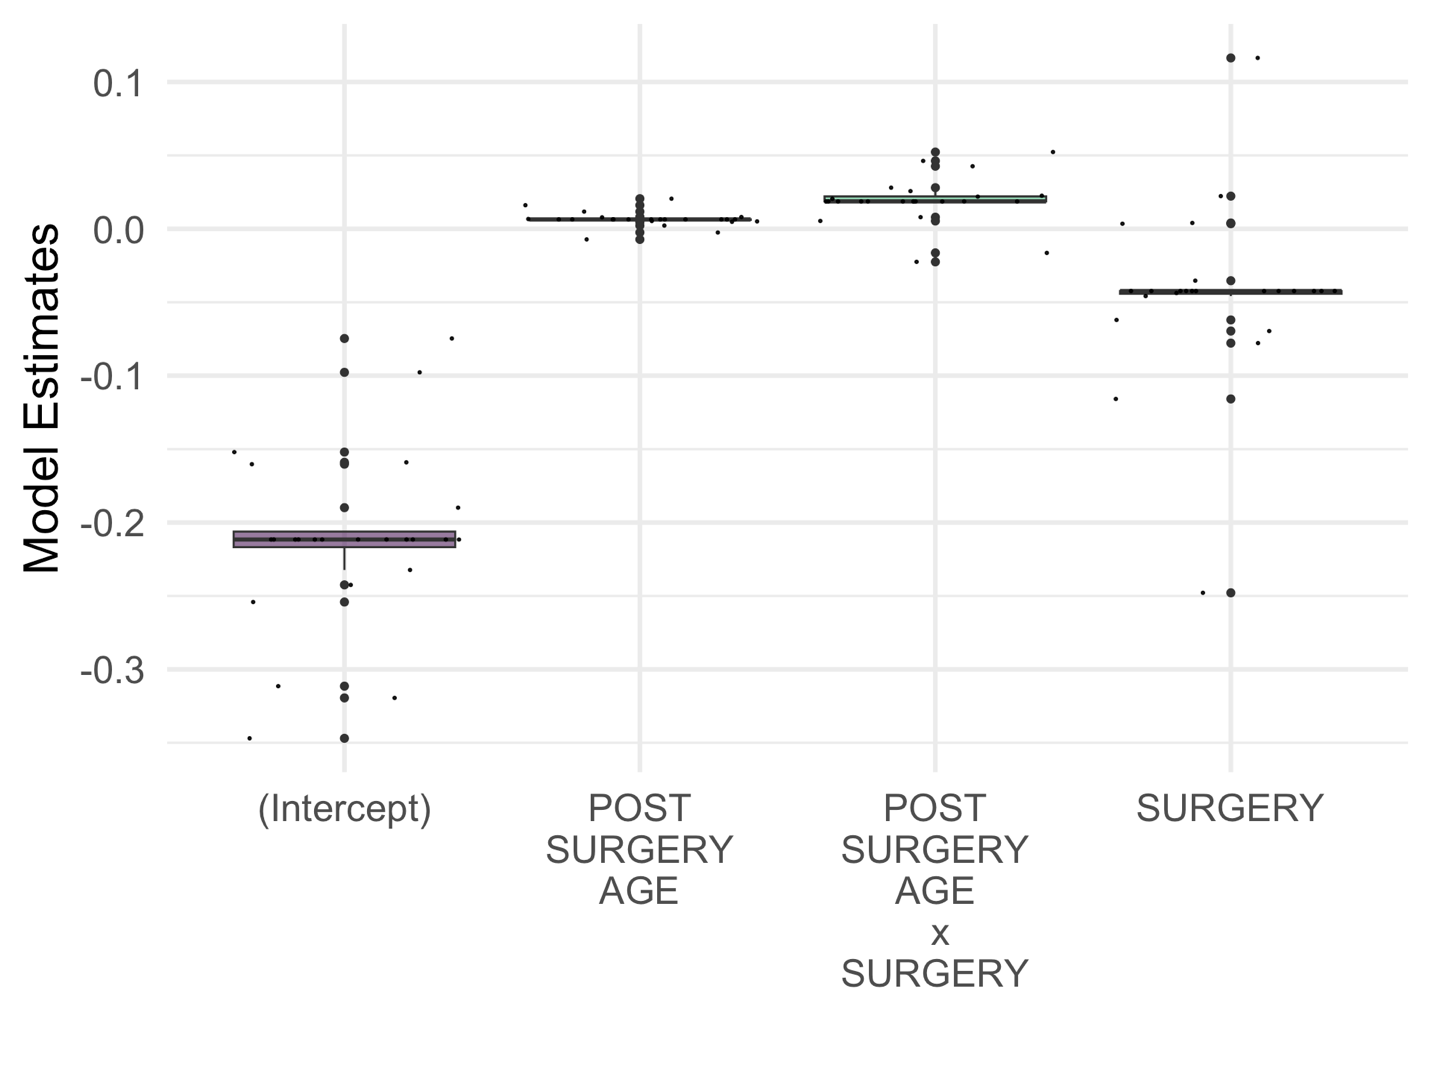


|  | **Min.** | **1st Qu.** | **Median** | **Mean** | **3rd Qu.** | **Max.** |
| --- | --- | --- | --- | --- | --- | --- |
| (Intercept) | 0.154 | 0.351 | 0.354 | 0.381 | 0.377 | 0.731 |
| POST_SURGERY_AGE | 0.534 | 0.813 | 0.821 | 0.806 | 0.821 | 0.944 |
| SURGERY | 0.368 | 0.846 | 0.861 | 0.827 | 0.861 | 0.989 |
| POST_SURGERY_AGE x SURGERY | 0.432 | 0.701 | 0.741 | 0.706 | 0.741 | 0.930 |
